# Supplementary material
Source: PubMed Central journal article supplement (PMC5376216)
Supplement: NIHMS823250-supplement-01.pdf [file NIHMS823250-supplement-01.pdf]

## Supplement

**Supplemental Table 1. Neuroticism group demographic characteristics.**

|                                       | <b>High<br/>Neuroticism<br/>Patients<br/>(N = 108)</b> | <b>Normal<br/>Neuroticism<br/>Patients<br/>(N = 48)</b> | <b>High<br/>Neuroticism<br/>Controls<br/>(N = 17)</b> | <b>Normal<br/>Neuroticism<br/>Controls<br/>(N = 108)</b> | <b>p-Value</b> |
|---------------------------------------|--------------------------------------------------------|---------------------------------------------------------|-------------------------------------------------------|----------------------------------------------------------|----------------|
| <b>Mean Age</b>                       | 32.17 ± 1.21                                           | 32.33 ± 1.69                                            | 26.12 ± 1.79                                          | 31.57 ± 1.14                                             | 0.43           |
| <b>Sex</b>                            |                                                        |                                                         |                                                       |                                                          | 0.36           |
| Male                                  | 75                                                     | 30                                                      | 10                                                    | 64                                                       |                |
| Female                                | 33                                                     | 18                                                      | 7                                                     | 44                                                       |                |
| <b>Race</b>                           |                                                        |                                                         |                                                       |                                                          | 0.12           |
| White                                 | 73                                                     | 22                                                      | 12                                                    | 74                                                       |                |
| Black/African American                | 28                                                     | 24                                                      | 4                                                     | 30                                                       |                |
| Other                                 | 7                                                      | 2                                                       | 1                                                     | 4                                                        |                |
| <b>Mean Parental Education</b>        | 14.04 ± 0.34                                           | 13.67 ± 0.47                                            | 15.12 ± 0.50                                          | 14.44 ± 0.20                                             | 0.04*          |
| <b>Mean Age at Onset of Illness</b>   | 20.55 ± 0.55                                           | 22.18 ± 0.84                                            | --                                                    | --                                                       | 0.11           |
| <b>Mean Duration of Illness</b>       | 10.26 ± 1.49                                           | 10.49 ± 2.02                                            | --                                                    | --                                                       | 0.92           |
| <b>Mean Chlorpromazine Equivalent</b> | 458.02 ± 31.50                                         | 491.92 ± 49.16                                          | --                                                    | --                                                       | 0.57           |
| <b>Mean PANSS Score</b>               |                                                        |                                                         |                                                       |                                                          |                |
| Positive Subscale                     | 18.46 ± 0.68                                           | 18.35 ± 0.88                                            | --                                                    | --                                                       | 0.92           |
| Negative Subscale                     | 15.24 ± 0.68                                           | 18.24 ± 1.23                                            | --                                                    | --                                                       | 0.04*          |
| General Subscale                      | 32.90 ± 0.81                                           | 30.41 ± 1.15                                            | --                                                    | --                                                       | 0.08           |

\* significant at  $\alpha=0.05$  level
